# Supplementary material for: Generation of sphingosine-1-phosphate is enhanced in biliary tract cancer patients and is associated with lymphatic metastasis
Source: PubMed Central journal article supplement (PMC6050292; doi:10.1038/s41598-018-29144-9), 2018-07-17
Supplement: 41598_2018_29144_MOESM1_ESM.pdf [file 41598_2018_29144_MOESM1_ESM.pdf]

Title:

**Generation of sphingosine-1-phosphate is enhanced in biliary tract cancer patients and is associated with lymphatic metastasis**

Yuki Hirose<sup>a\*</sup>, Masayuki Nagahashi<sup>a+</sup>, Eriko Katsuta<sup>b\*</sup>, Kizuki Yuza<sup>a</sup>, Kohei Miura<sup>a</sup>, Jun Sakata<sup>a</sup>, Takashi Kobayashi<sup>a</sup>, Hiroshi Ichikawa<sup>a</sup>, Yoshifumi Shimada<sup>a</sup>, Hitoshi Kameyama<sup>a</sup>, Kerry-Ann McDonald<sup>b</sup>, Kazuaki Takabe<sup>a-c</sup>, Toshifumi Wakai<sup>a</sup>

<sup>a</sup> Division of Digestive and General Surgery, Niigata University Graduate School of Medical and Dental Sciences, Niigata City, Niigata 951-8510, Japan

<sup>b</sup> Breast Surgery, Department of Surgical Oncology, Roswell Park Comprehensive Cancer Center, Buffalo, New York 14263, USA

<sup>c</sup> Department of Surgery, University at Buffalo Jacobs School of Medicine and Biomedical Sciences, the State University of New York, Buffalo, New York 14203, USA

<sup>d</sup> Department of Breast Surgery and Oncology, Tokyo Medical University, Shinjuku-ku, Tokyo 160-8402, Japan.

<sup>e</sup> Department of Surgery, Yokohama City University, Kanazawa-ku, Yokohama 236-0004, Japan.

\* These authors contributed equally to this study

**<sup>+</sup>Corresponding author:**

Masayuki Nagahashi, M.D., Ph.D.

Division of Digestive and General Surgery

Niigata University Graduate School of Medical and Dental Sciences

1-757 Asahimachi-dori, Chuo-ku, Niigata City, 951-8510 Japan

**E-mail:** mnagahashi@med.niigata-u.ac.jp

**Telephone:** +81-25-227-2228

**Fax:** +81-25-227-0779

# Supplementary Figure 1

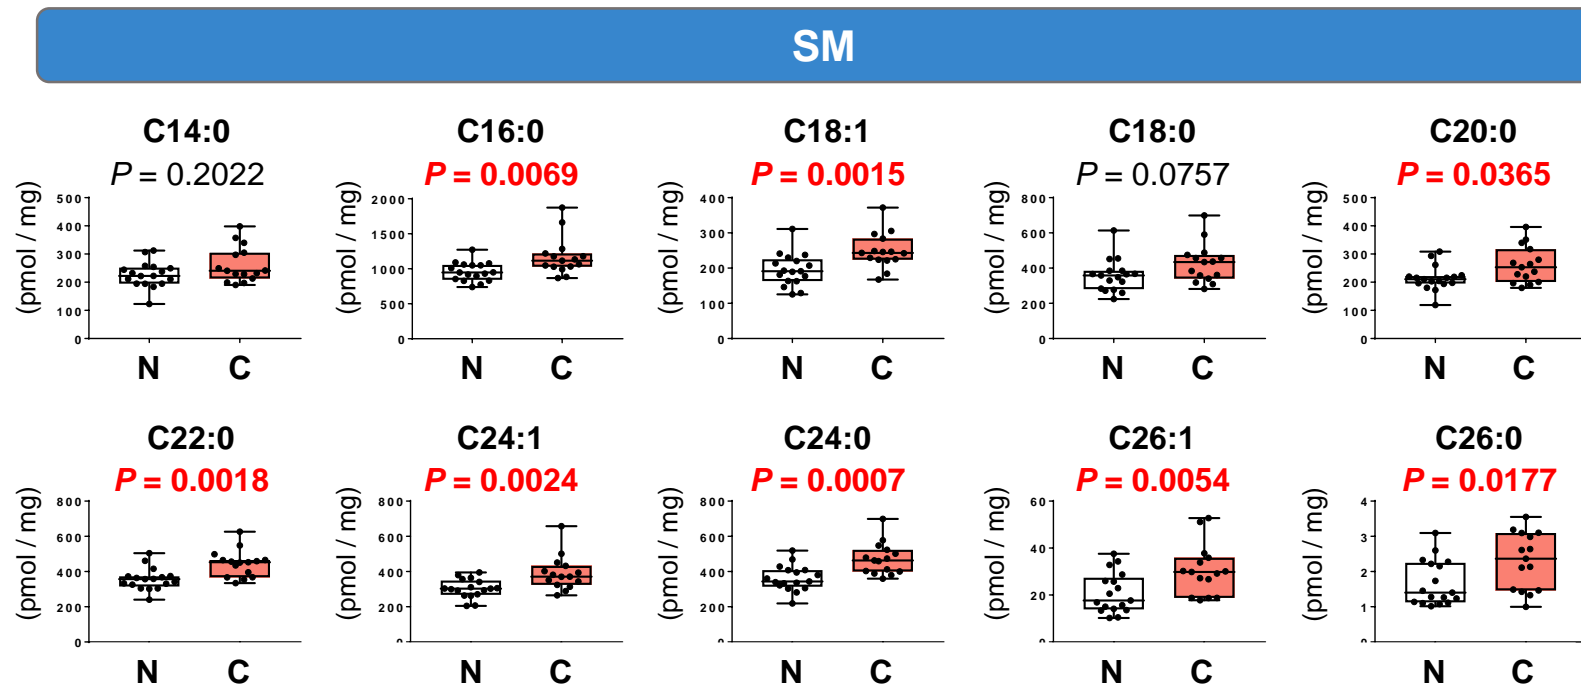

**Supplementary Figure 1.** The level of SM species (C14:0, C16:0, C18:1, C18:0, C20:0, C22:0, C24:1, C24:0, C26:1, and C26:0) in biliary tract cancer (n = 15) and normal biliary tract tissue (n = 17) were determined by LC-ESI-MS/MS. Mean values are shown by the horizontal lines. Two-sided  $P$  values < 0.05 were considered statistically significant (Mann-Whitney U test). N: normal biliary tract tissue; C: biliary tract cancer tissue.

# Supplementary Figure 2

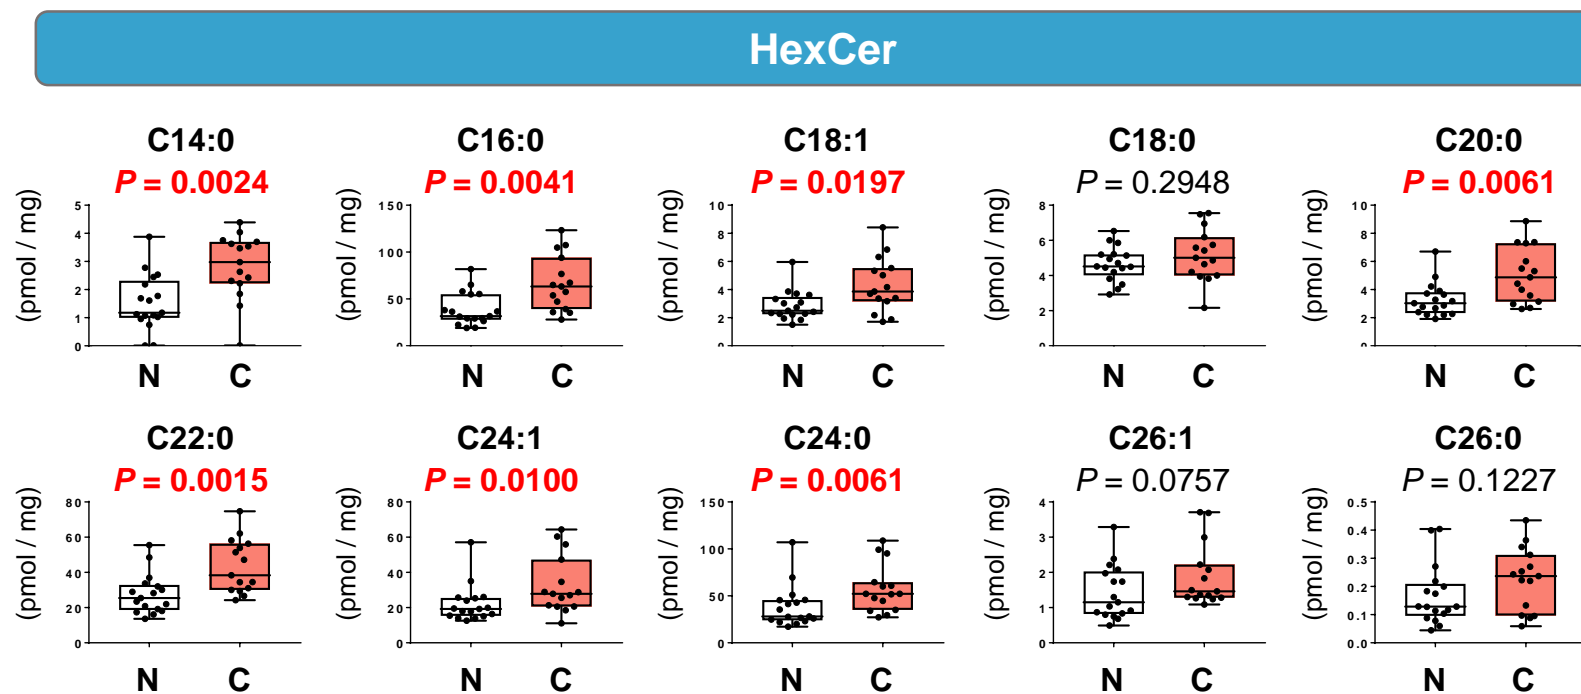

**Supplementary Figure 2.** The level of HexCer species (C14:0, C16:0, C18:1, C18:0, C20:0, C22:0, C24:1, C24:0, C26:1, and C26:0) in biliary tract cancer (n = 15) and normal biliary tract tissue (n = 17) were determined by LC-ESI-MS/MS. Mean values are shown by the horizontal lines. Two-sided *P* values < 0.05 were considered statistically significant (Mann-Whitney U test). N: normal biliary tract tissue; C: biliary tract cancer tissue.

# Supplementary Figure 3

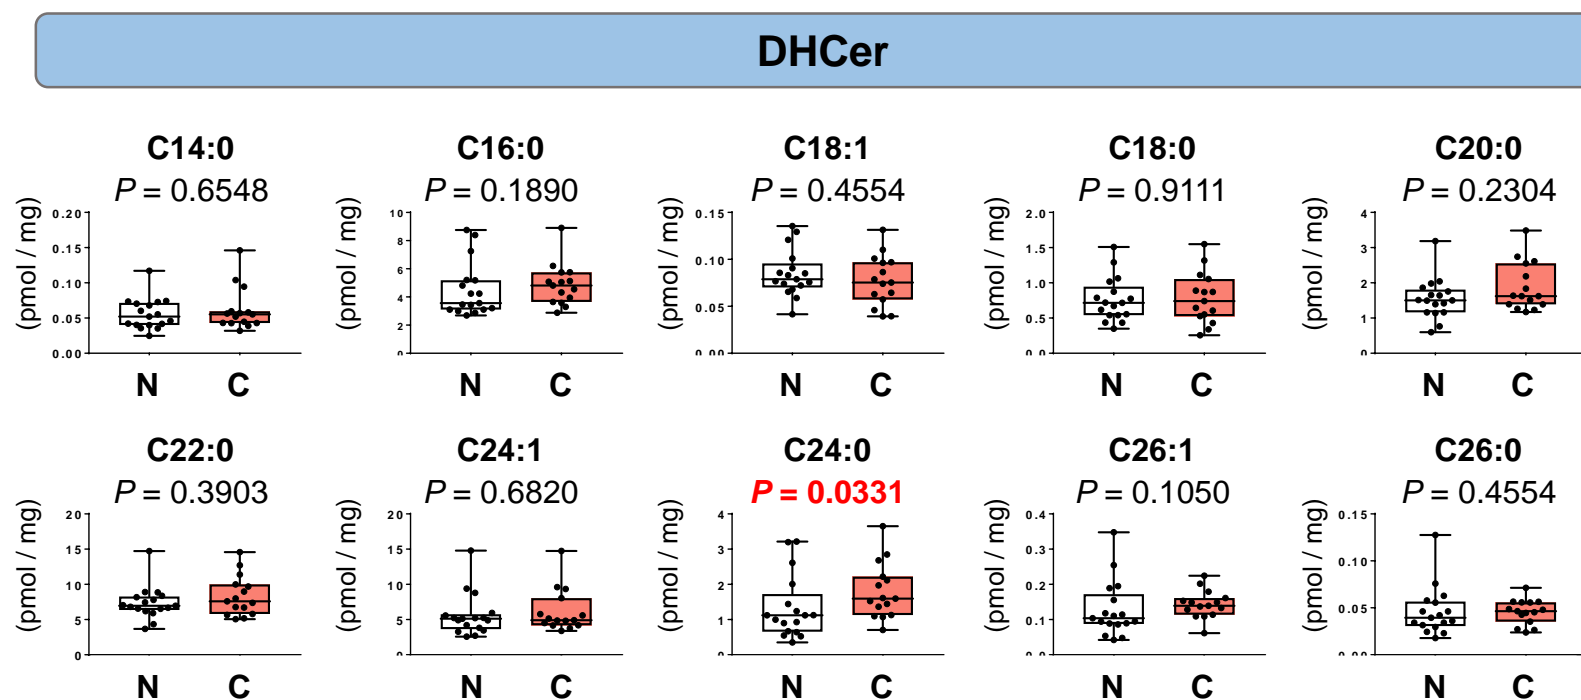

**Supplementary Figure 3.** The level of DHCer species (C14:0, C16:0, C18:1, C18:0, C20:0, C22:0, C24:1, C24:0, C26:1, and C26:0) in biliary tract cancer (n = 15) and normal biliary tract tissue (n = 17) were determined by LC-ESI-MS/MS. Mean values are shown by the horizontal lines. Two-sided  $P$  values < 0.05 were considered statistically significant (Mann-Whitney U test). N: normal biliary tract tissue; C: biliary tract cancer tissue.

## Supplementary Figure 4

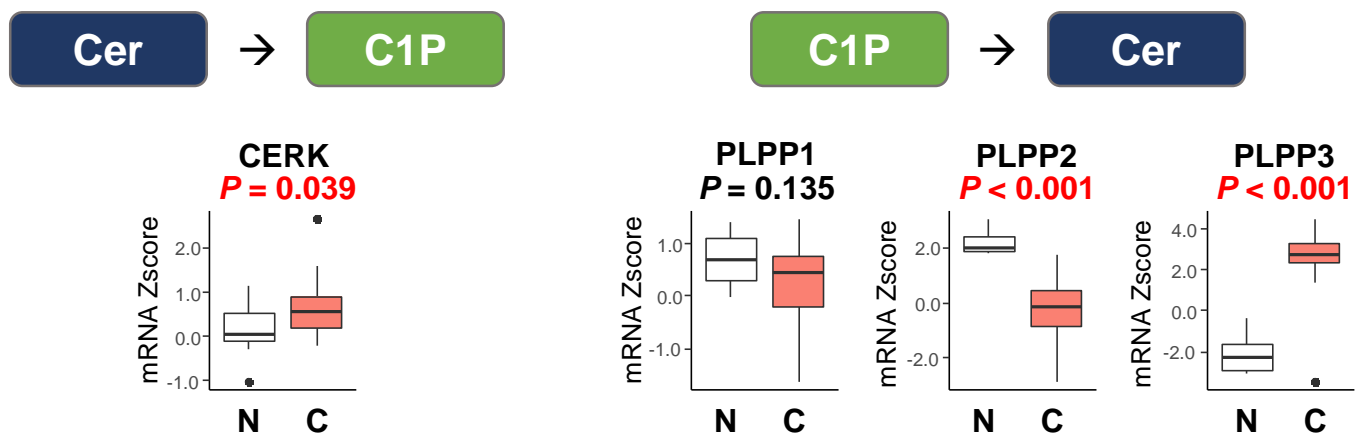

**Supplementary Figure 4.** The gene expression level of CERK and PLPPs in TCGA cohort (36 and 9 samples of cancer and non-cancer tissue in cholangiocarcinoma cohort) were analyzed. Mean values are shown by the horizontal lines. Two-sided  $P$  values  $< 0.05$  were considered statistically significant (Mann-Whitney U test). N: normal biliary tract tissue; C: biliary tract cancer tissue.

## Supplementary Figure 5

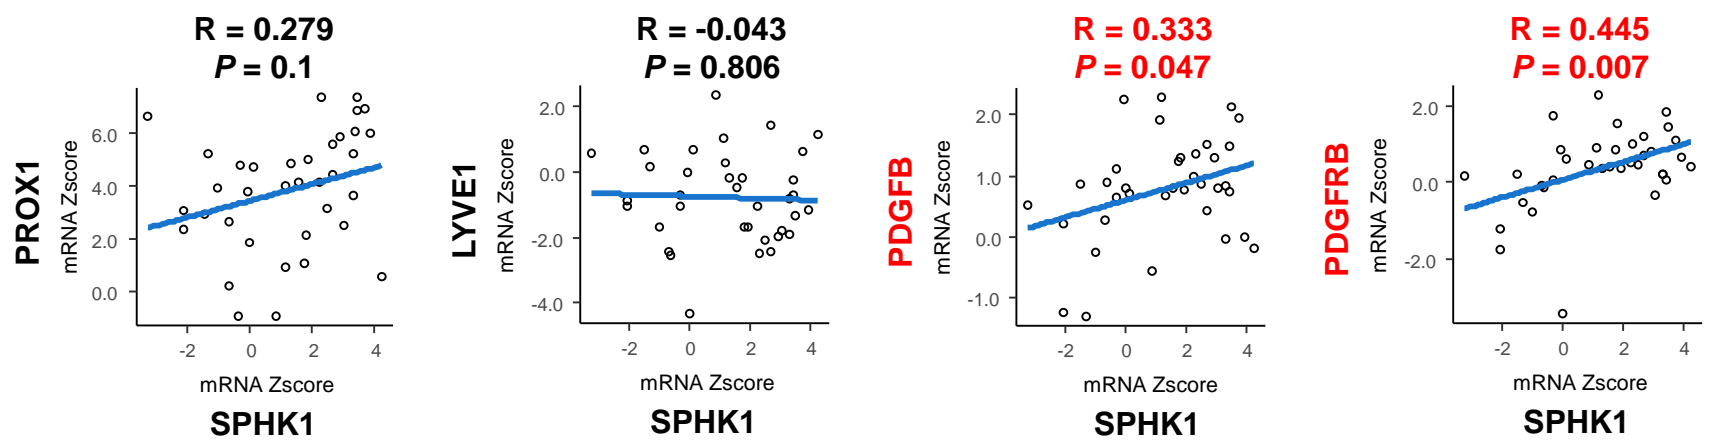

**Supplementary Figure 5.** Pearson correlations were calculated between gene expression level of SPHK1 and those of PROX1, LYVE1, PDGFB, and PDGFR $\beta$  in biliary tract cancer in TCGA cohort (36 samples of cancer tissue in cholangiocarcinoma cohort). All tests were two-sided, and  $P$  values  $< 0.05$  were considered statistically significant.

## Supplementary Figure 6

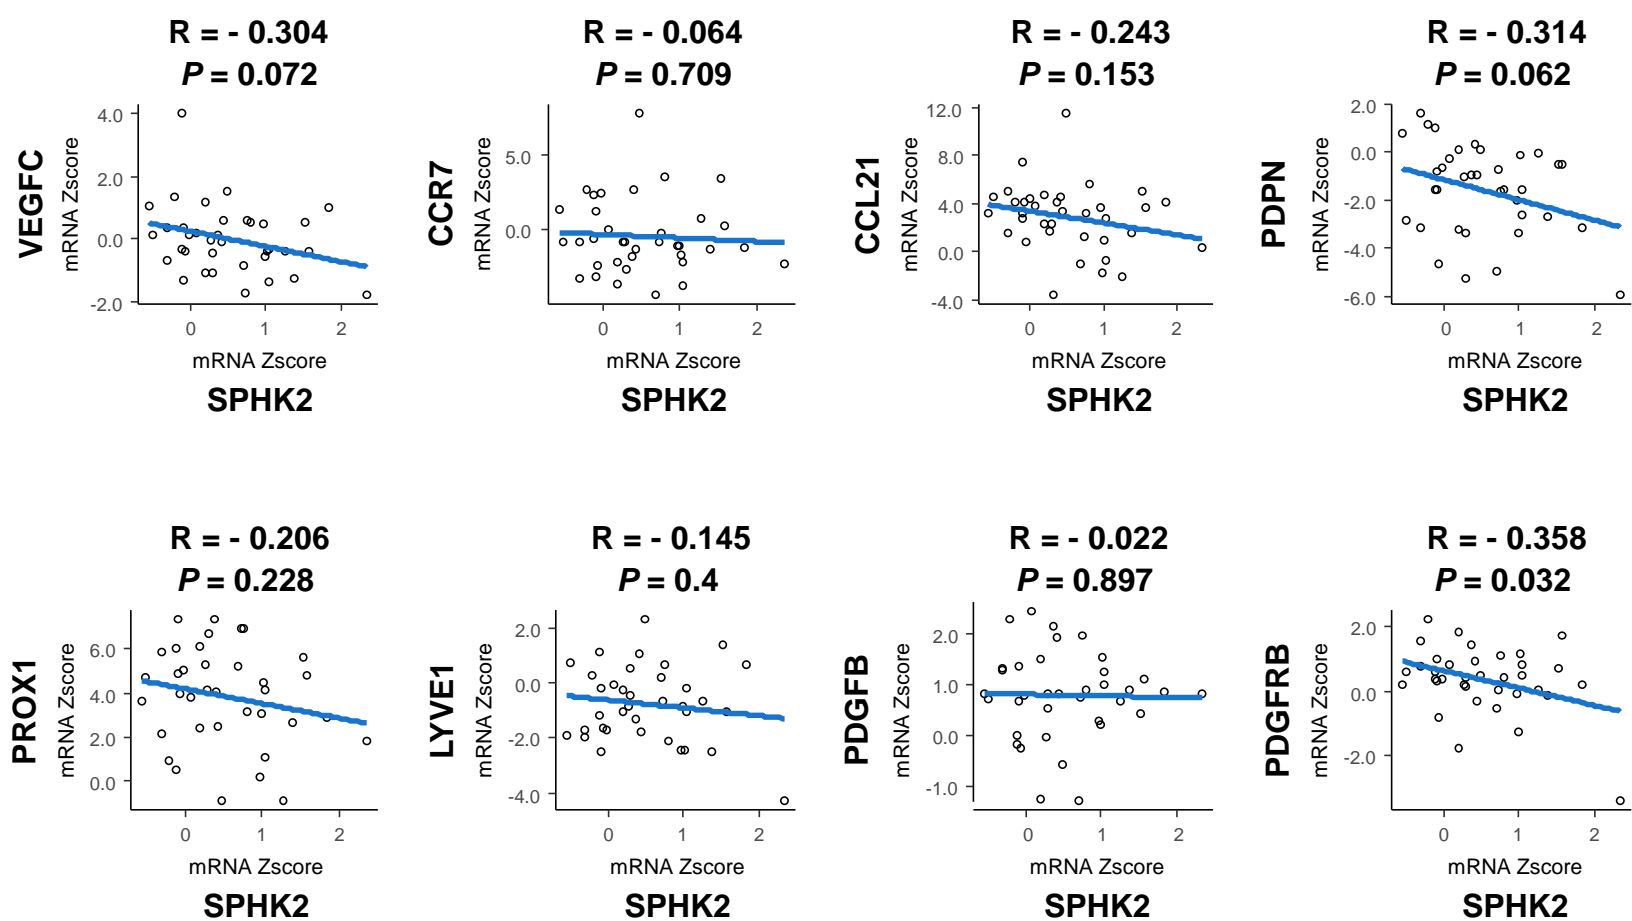

**Supplementary Figure 6.** Pearson correlations were calculated between gene expression level of SPHK2 and those of VEGFC, CCR7, CCL21, PDPN, PROX1, LYVE1, PDGFB, and PDGFR $\beta$  in biliary tract cancer in TCGA cohort (36 samples of cancer tissue in cholangiocarcinoma cohort). All tests were two-sided, and  $P$  values  $< 0.05$  were considered statistically significant.

# Supplementary Figure 7

a

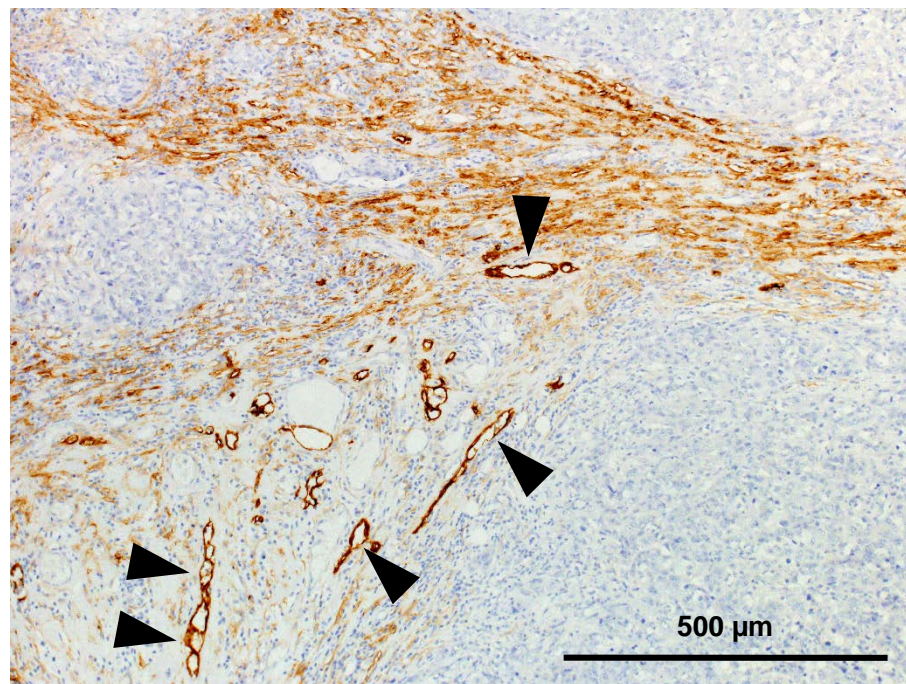

b

|                                       | No. of patients with   |                       | <i>P</i> value |
|---------------------------------------|------------------------|-----------------------|----------------|
|                                       | pSPHK1 high expression | pSPHK1 low expression |                |
| Intratumoral lymphatic vessel density |                        |                       | > 0.999        |
| High                                  | 6                      | 2                     |                |
| Low                                   | 9                      | 3                     |                |

**Supplementary Figure 7.** (a) Immunohistochemical staining of D2-40 in biliary tract cancer is shown. Arrow heads shows lymphatic vessels in gallbladder cancer. Scale bar = 500  $\mu\text{m}$ . (b) The association between the pSPHK1 expression and intratumoral lymphatic vessel density in gallbladder cancer tissues with ( $n = 10$ ) or without lymph node metastasis ( $n = 10$ ) was evaluated by the Fisher's exact test. All tests were two-sided, and  $P$  values  $< 0.05$  were considered statistically significant.
